# Supplementary material
Source: publisher figshare collection journal article supplement (https://sage.figshare.com/ndownloader/files/20502735)
Supplement: Supplementary file 1 [file 20502735]

## Appendix A

### Questions Pertaining to Inmates' Misconduct in Prison

During the current incarceration, I have had the following experiences or exhibited the following behaviors.

1. Using prohibited drugs.
2. Selling prohibited drugs.
3. Drinking alcohol.
4. Selling alcohol.
5. Possessing weapons.
6. Having quarrels with correctional staff.
7. Attacking correctional staff without weapons.
8. Attacking correctional staff with weapons.
9. Having quarrels with other inmates.
10. Attacking other inmates, without weapons.
11. Attacking other inmates, with weapons.
12. Escaping or attempting to escape.
13. Hiding stolen objects.
14. Hiding prohibited objects.
15. Using force on other inmates to have intimate acts with me (e.g., kisses, touching) or to have sex with me.
16. Without any force, having intimate behaviors with other inmates (e.g., kisses, touching), or having sex with other inmates.
17. Without force, having intimate acts with correctional staff (e.g., kisses, touching) or sex.
18. Threatening, smirking, or scolding other inmates.
19. Embarrassing or provoking other inmates.
20. Intentionally isolating some other inmates.
21. Not allowing other inmates to sleep or eat.
22. Punishing other inmates (e.g., holding a bucket above head)
23. Forcing other inmates to get tattoos.
24. Intentionally assigning more work or more difficult work to other inmates.
25. Forcing other inmates to do more chores in a cell.
26. Forcing other inmates to render a service to me (e.g., delivering messages, doing laundry).
27. Forcefully taking other inmates' food or daily necessities.
28. Forcing other inmates to gamble.

## CODs and Prison Misconduct in Taiwan

29. Forcing other inmates to pay cell fees.
30. Forcing other inmates to ask their family to send money, food, or gifts to me.
31. Forcing other inmates to mail package for me.
32. Forcing other inmates to exchange things with me.
33. Forcing other inmates to exchange their new things with my old things.
34. Forcing other inmates to exchange their bed with mine.
35. Forcing other inmates to join a subcultural group in prison.
36. Not allowing other inmates to go to bathroom in a cell.
37. Threatening other inmates and intentionally making them feel fearful.
38. Taking other inmates' things without permission.
39. Threatening to beat up other inmates.
40. Spreading rumors about other inmates.
41. Forcing other inmates to be a scapegoat (take the blame).

The response categories are: never, one time, two times, more than three times.

## Appendix B

### Questions Pertaining to Mental Health Disorders

1. In the 12 months before my current incarceration, I ...

(Cronbach's  $\alpha$  = .856; Eigenvalue = 2.340)

- (1) was diagnosed with mental health disorder(s).
- (2) was hospitalized or took medications because of mental illness.
- (3) received mental illness treatments by professionals.

If a respondent answered "yes" to any of the above items, the respondent was placed in the category of "mental health disorders."

2. In the 12 months before my current incarceration, I had the following symptoms.

((items (3)–(8) Cronbach's  $\alpha$  = .821; Eigenvalue = 3.173))

- (1) I felt sad, numb, and empty.
- (2) I had lost interest in everything.
- (3) I had either increased appetite or decreased appetite.
- (4) I had insomnia or slept a lot.
- (5) I felt uneasy, fussy, or dull.
- (6) I had strong feelings of guilt or feelings that I was useless.
- (7) It was hard for me to concentrate.
- (8) I had thoughts of committing suicide.

If survey participant answered "yes" to at least one of (1) and (2), and answered "yes" to at least four questions among (3)–(8), he was classified to the group of "major depression."

3. In the 12 months before my current incarceration, ...

((items (1)–(3) Cronbach's  $\alpha$  = .726; Eigenvalue = 1.942))

((items (6)–(9) Cronbach's  $\alpha$  = .635; Eigenvalue = 1.937))

- (1) I lost my patience easily.
- (2) I got angry more easily than before.
- (3) I had thrown out things or injured someone because of anger.
- (4) I had changed my sleeping habits.
- (5) I had racing thoughts and it was hard for me to keep track of them.
- (6) I could not work and rest regularly.
- (7) I had no interest in sex.
- (8) It seemed that I talked and moved more slowly.
- (9) I could not stand still for some periods.

If a survey participant answered “yes” to at least one item among (1)–(3), or “yes” to at least one item of (4) and (5), or “yes” to at least one item among (6)–(9), he was classified as having “manic disorders.”

4. In the 12 months prior to the current incarceration, ...  
((items (1), (2), and (3) Cronbach’s alpha = .609; Eigenvalue = 1.651))
- (1) I felt other people could read my mind.
  - (2) I felt other people could control my mind or my thoughts.
  - (3) I felt other people spied on me.
  - (4) I could see things other people could not.
  - (5) I could hear something that other people could not.

If a survey participant answered “yes” to at least one item of (1)–(3) or “yes” to at least one item of (4)–(5), he met the criteria for “psychotic disorders.”

## Appendix C

### Questions Pertaining to Substance Dependence/Abuse Disorders

#### *Part I*

1. In the 12 months before the current incarceration, I had been drinking alcohol or using illegal substances that led to...  
(Cronbach's alpha = .754; Eigenvalue = 2.314)
  - (1) my being unable to do what I should to – for example, unable to work, go to school, or take care of children, etc.
  - (2) my getting into hazardous situations. For example, I drove a car, swam, used machines, or walked around in a driveway after drinking alcohol or using illegal drugs.
  - (3) an arrest by police.
  - (4) a quarrel or a fight with family members, spouse, or friends.

#### *Part II*

2. In the 12 months before the current incarceration, I had the following experience.  
(Cronbach's alpha = .890; Eigenvalue = 4.230)
  - (1) I had to drink more alcohol or use more drugs to get the effect I wanted.
  - (2) When I was trying to reduce drinking or substance use, or stop drinking or using drugs, I would experience a number of bad side effects, such as shivering and vomiting, or I had to take medicine to reduce bad side effects.
  - (3) I would drink or use substances longer than before.
  - (4) I tried numerous times to drink less or use drugs less, and more than once I tried to quit drinking or using drugs, but failed.
  - (5) I spent a lot of time drinking alcohol or using drugs, and spent a lot of time overcoming side effects derived from attempts to stop drinking or using drugs.
  - (6) Because of drinking alcohol or using drugs, I gave up on my interests, or did not maintain contact with my family members or friends like I did before.
  - (7) Even though I had mental problems, I continued to drink alcohol or use drugs.

Scoring: If a survey respondent answered “yes” to at least one item in the first part, or “yes” to at least three items in the second part, he would be classified into the category of “substance abuse disorders” in the current study.
